# Supplementary material for: Biofilm formation of anoxygenic photosynthetic bacteria induced by phototaxis for enhancing hydrogen production
Source: Royal Society of Chemistry journal article supplement (doi:10.1039/c5ew00019j), 2015-01-01
Supplement: c5ew00019j1.pdf [file c5ew00019j1.pdf]

## Supplementary information

**Figure S1.** Image of biofilm on sidewalls of (a) Reactor 2 and (b) Reactor 1.

**Figure S2.** Intracellular c-di-GMP levels in *R. palustris* near (a) the illuminated sidewall of Reactor 1 and (b) illuminated liquid surface of Reactor 2.

**Figure S3.** Representative micrographs of FISH performed on biofilm from PRBC1 and PRBC2 at day 30: all bacteria appear in blue (hybridised with DAPI) and *R. palustris* appear in red (hybridised with Rpal686-TAMRA)

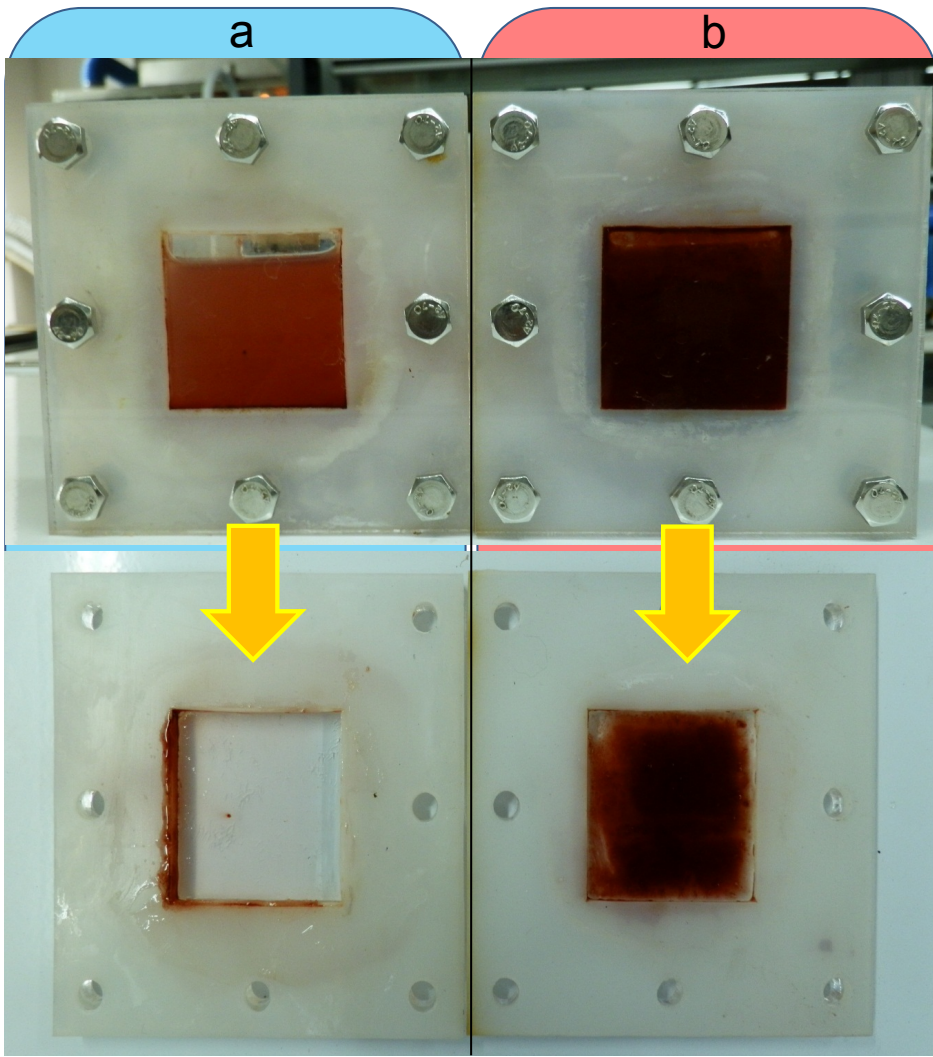

Figure S1. Image of biofilm on sidewalls of (a) Reactor 2 and (b) Reactor 1.

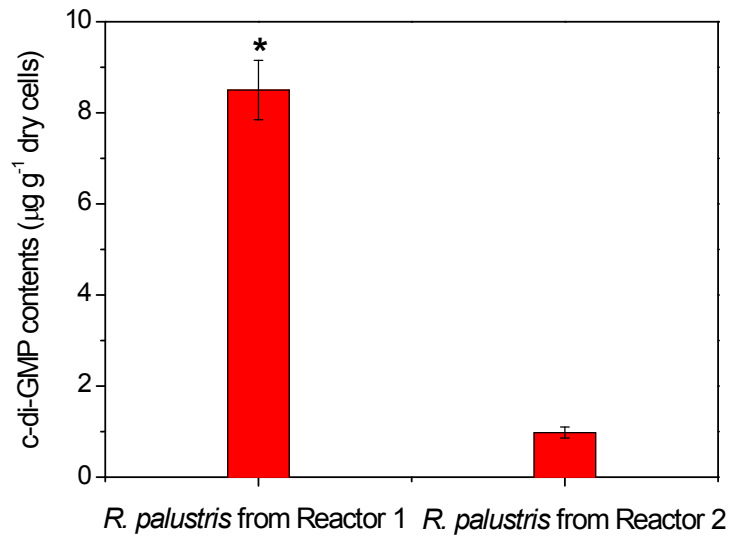

Figure S2. Intracellular c-di-GMP levels in *R. palustris* near (a) the illuminated sidewall of Reactor 1 and (b) liquid surface of Reactor 2 (\* $P < 0.05$ ).

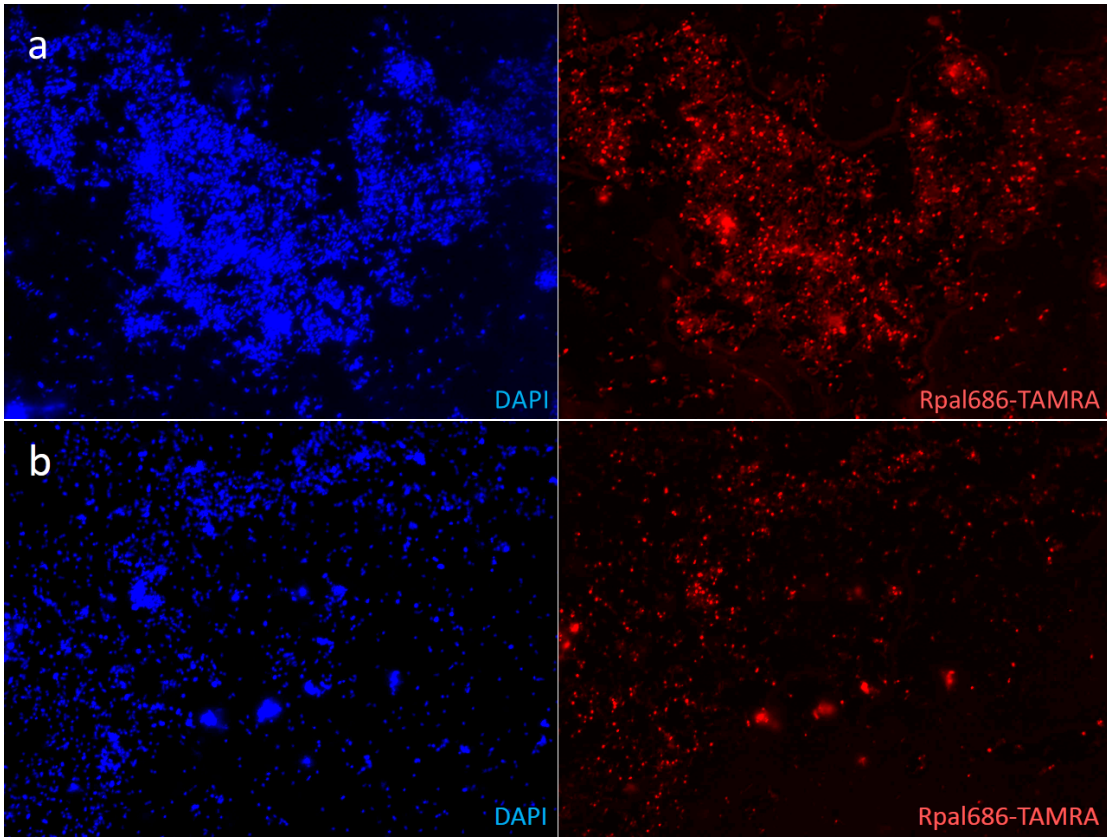

Figure S3. Representative micrographs of FISH performed on biofilm from PRBC1 and PRBC2 at day 30: all bacteria appear in blue (hybridized with DAPI) and *R. palustris* appear in red (hybridized with Rpal686-TAMRA)
